# Supplementary material
Source: ML conference proceedings conference paper supplement (https://openaccess.thecvf.com/content/WACV2023/html/Shafique_Creating_a_Forensic_WACV_2023_paper.html)
Supplement: Supplementary file 2 [file Shafique_Creating_a_Forensic_WACV_2023_supplemental.zip]

Archive with 2 entries (2 files):
- 0449-supp.pdf
- syn_light_visual.gif
