# Supplementary material
Source: ML conference proceedings conference paper supplement (https://openaccess.thecvf.com/content/WACV2023/html/Shafique_Creating_a_Forensic_WACV_2023_paper.html)

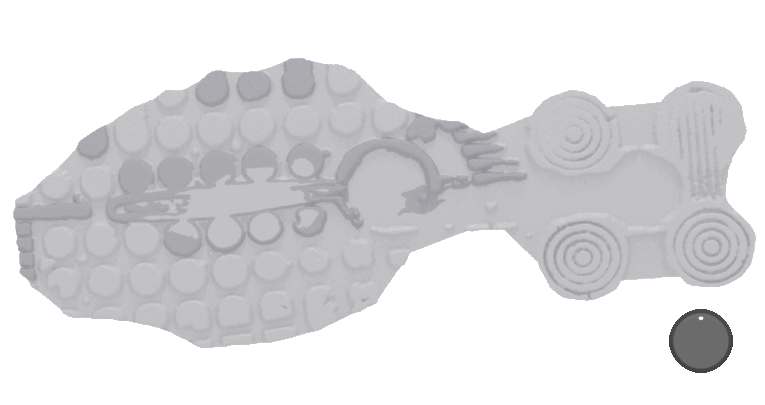

Supplement: Supplementary file 2 [file Shafique_Creating_a_Forensic_WACV_2023_supplemental.zip › syn_light_visual.gif]
